# Supplementary material for: Monitoring of seven industrial anaerobic digesters supplied with biochar
Source: Research Square preprint supplement (doi:10.21203/rs.3.rs-499198/v1), 2021-05-13
Supplement: Supplementary file 1 [file 2d90c4bd2bb98729625e15b6.xlsx]

## Sheet: Acetic acid
	Acetic acid
	BGP1
	Day of sampling [d]	0	6	7	14	21	35	41	49	55	56	63	69	83	70	77	84	90	97	98	104	111	112	118	119	132	140	146	153	154	174	175	188	189	203	209	223	238	237	246	266	272	280	294	300	325	328	358	359
	mg/L	1450	1100	1200	1400	840	750	1400	1200	510	1400	1300	1100	900	1400	1400	1800	940	930	1200	980	1000	1100	1500	640	1100	540	1000	680	580	620	470	620	510	450	500	530	800	570	610	600	500	480	470	480	540	440	480	430
	BGP2
	Day of sampling [d]	0	16	17	19	21	28	32	42	44	50	70	87	127	140	140	190	273	315
	mg/L	6200	5000	4300	3500	3400	2700	2800	2400	3100	2800	2600	3800	3200	2600	610	2000	1400	1700
	BGP3
	Day of sampling [d]	0	178	367
	mg/L	710	160	140
	BGP4
	Day of sampling [d]	0	29	42	73	114	140	169	204	238	259	288	319	354
	mg/L	145	320	535	465	505	325	320	785	1150	530	585	405	350
	BGP5
	Day of sampling [d]	0	50	153
	mg/L	1100	1000	200
	BGP6
	Day of sampling [d]	0	14	28	35	48	77	98	106	115	130	155	175	189	197	211	225	238	252	274	280	288	309
	mg/L	1100	993.5	1425	1650	1130	1705	990.5	215	270	176.5	1000	650	1360	71.5	1895	1135	682.5	373.5	720	570	740	2225
	BGP7
	Day of sampling [d]	0	31	77	112	147
	mg/L	223	282	175	166	300

## Sheet: Propionic acid
	Propionic acid
	BGP1
	Day of sampling [d]	0	6	7	14	21	35	41	49	55	56	63	69	83	70	77	84	90	97	98	104	111	112	118	119	132	140	146	153	154	174	175	188	189	203	209	223	238	237	246	266	272	280	294	300	325	328	358	359
	mg/L	425	130	290	190	81	84	390	480	0	510	360	310	91	280	510	1100	140	80	550	95	210	130	520	0	220	56	100	57	0	58	51	51	75	0	0	0	0	99	0	0	0	0	0	0	0	0	150	480
	BGP2
	Day of sampling [d]	0	16	17	19	21	28	32	42	44	50	70	87	127	140	140	190	273	315
	mg/L	1800	1700	1600	1500	1400	930	820	590	750	580	680	870	840	530	65	420	330	320
	BGP3
	Day of sampling [d]	0	178	367
	mg/L	330	0	0
	BGP4
	Day of sampling [d]	0	29	42	73	114	140	169	204	238	259	288	319	354
	mg/L	535	0	0	0	0	0	0	20	30	0	25	25	0
	BGP5
	Day of sampling [d]	0	50	153
	mg/L	200	180	0
	BGP6
	Day of sampling [d]	0	14	28	35	48	77	98	106	115	130	155	175	189	197	211	225	238	252	274	280	288	309
	mg/L	1915	485	1026	1400	1045	1160	627	235	625	26	475	550	340	0	705	850	170	295	805	395	105	1800
	BGP7
	Day of sampling [d]	0	31	77	112	147
	mg/L	0	52	0	0	28

## Sheet: Buryric acid
	Butyric acid
	BGP1
	Day of sampling [d]	0	6	7	14	21	35	41	49	55	56	63	69	83	70	77	84	90	97	98	104	111	112	118	119	132	140	146	153	154	174	175	188	189	203	209	223	238	237	246	266	272	280	294	300	325	328	358	359
	mg/L	0	0	0	0	0	0	0	0	0	0	0	0	0	0	0	0	0	0	0	0	0	0	0	0	0	0	0	0	0	0	0	0	0	0	0	0	0	0	0	0	0	0	0	0	0	0	0	0
	BGP2
	Day of sampling [d]	0	16	17	19	21	28	32	42	44	50	70	87	127	140	140	190	273	315
	mg/L	143	139.5	123	75	60	31.5	30.5	0	0	25	27.5	36.5	27	0	0	0	0	0
	BGP3
	Day of sampling [d]	0	178	367
	mg/L	30	0	0
	BGP4
	Day of sampling [d]	0	29	42	73	114	140	169	204	238	259	288	319	354
	mg/L	0	0	0	0	0	0	0	0	0	0	0	0	0
	BGP5
	Day of sampling [d]	0	50	153
	mg/L	0	0	0
	BGP6
	Day of sampling [d]	0	14	28	35	48	77	98	106	115	130	155	175	189	197	211	225	238	252	274	280	288	309
	mg/L	17.5	0	27.5	13.5	17.5	27.5	12.75	0	0	0	0	0	13.5	0	27.5	12.75	0	0	13.5	0	0	107.5
	BGP7
	Day of sampling [d]	0	31	77	112	147
	mg/L	0	0	0	0	0
